# Supplementary material for: Melatonin Reverses the Loss of Stemness Induced by TNF-α in Human Bone Marrow Mesenchymal Stem Cells through Upregulation of YAP Expression
Source: Hindawi journal article supplement (doi:10.1155/2019/6568394), 2019-12-30
Supplement: f1 [file 6568394.f1.pdf]

**Melatonin reverses the loss of stemness induced by TNF- $\alpha$  in human bone marrow mesenchymal stem cells through up-regulation of YAP expression**

**SUPPLEMENTARY FIGURES AND FIGURE LEGENDS**

**Supplementary Figure 1**

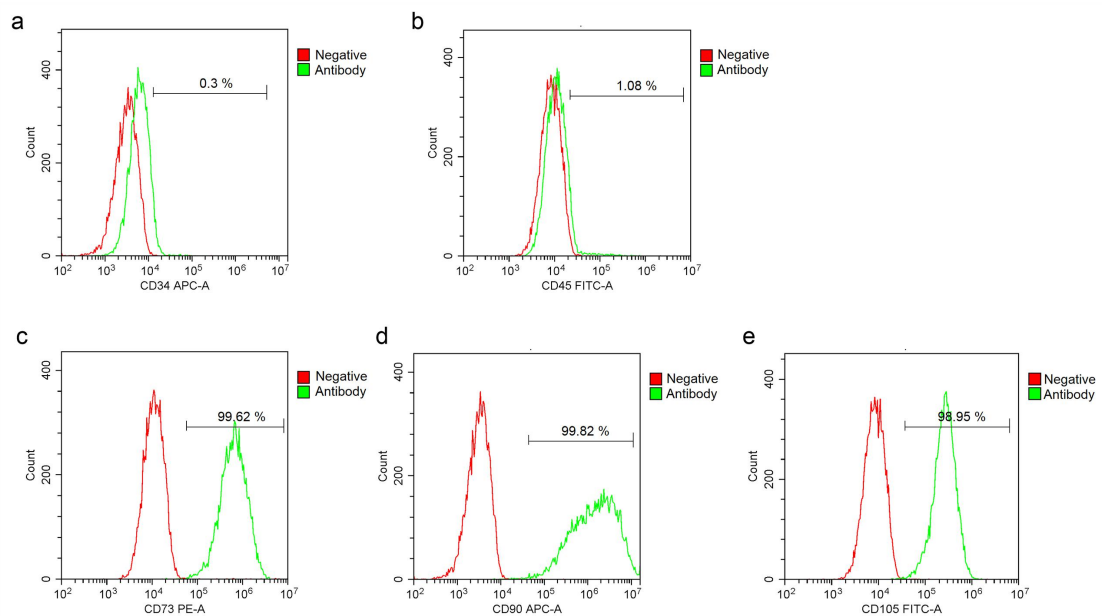

**Supplementary Figure 1** Identification of isolated BMMSCs. Flow cytometric analysis of CD34(a), CD45(b), CD73(c), CD90(d), and CD105(e).
